# Supplementary material for: The transcription factor EGR2 is the molecular linchpin connecting STAT6 activation to the late, stable epigenomic program of alternative macrophage polarization
Source: PubMed Central journal article supplement — Genes Dev. 2020 Nov 1;34(21-22):1474–92. doi: 10.1101/gad.343038.120 (PMC7608752; doi:10.1101/gad.343038.120), 2020-11-01
Supplement: supp_gad.343038.120_Supplemental_Fig_S1_DanielB.pdf [file supp_gad.343038.120_Supplemental_Fig_S1_DanielB.pdf]

Supplemental Fig. S1

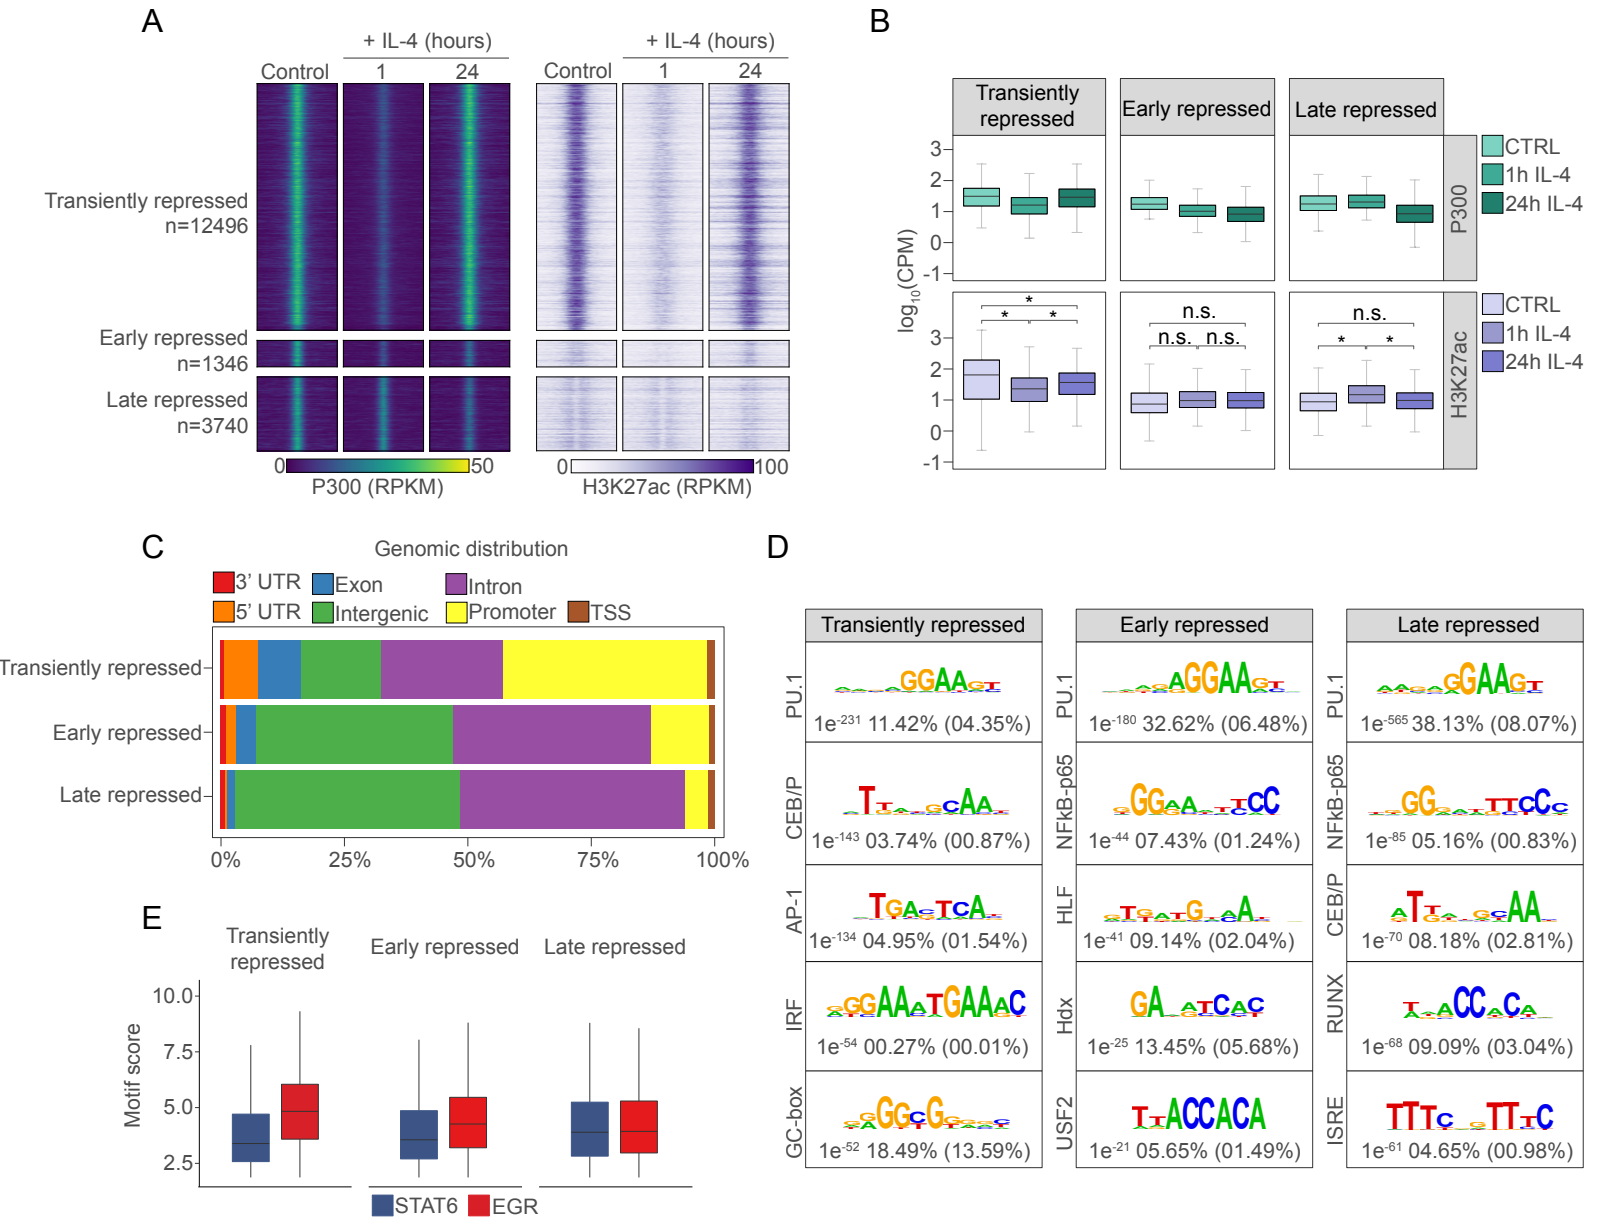

**Supplemental Fig. S1. Regulatory elements with repressed genome activity patterns during alternative macrophage polarization. Related to Fig. 1.**

**A**, Read distribution plot of P300 and H3K27ac ChIP-seq results in the three repressed genome activity pattern groups in control and IL-4 polarized macrophage for the indicated periods of time around the P300 summits in a 2kb window. Results are represented in RPKM (Reads Per Kilobase Million) values.

**B**, Average binding signal for P300 and H3K27ac are depicted on boxplots for the genomic regions showing repressed genome activity patterns. Log<sub>10</sub> CPM (Counts Per Million) values are plotted. Significant changes are determined with Wilcoxon-test at p<0.05.

**C**, Genomic distribution of the regulatory elements exhibiting repressed genome activity patterns.

**D**, Motif enrichment plots on the regulatory regions exhibiting different genome activity patterns. For each motif logo, p-value and percentage of genomic regions that contain the given motif in the target (P300-bound) and background genomic regions (in parenthesis) are shown.

**E**, Boxplot representation of STAT6 and EGR motif scores on the genome activity pattern groups are shown.
