# Supplementary material for: The transcription factor EGR2 is the molecular linchpin connecting STAT6 activation to the late, stable epigenomic program of alternative macrophage polarization
Source: PubMed Central journal article supplement — Genes Dev. 2020 Nov 1;34(21-22):1474–92. doi: 10.1101/gad.343038.120 (PMC7608752; doi:10.1101/gad.343038.120), 2020-11-01
Supplement: supp_gad.343038.120_Supplemental_Fig_S2_DanielB.pdf [file supp_gad.343038.120_Supplemental_Fig_S2_DanielB.pdf]

Supplemental Fig. S2

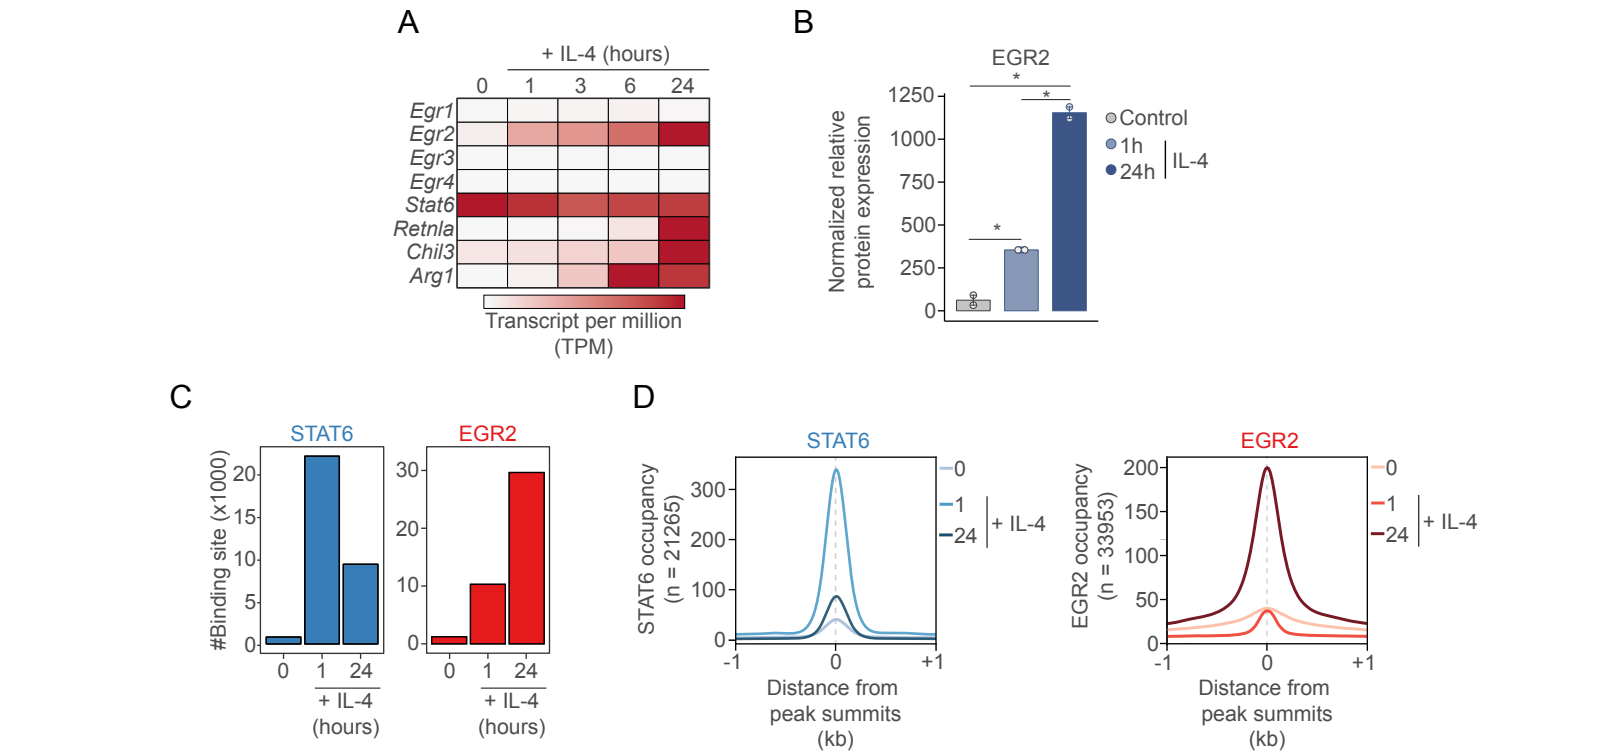

**Supplemental Fig. S2. *Egr2* is selectively induced by IL-4 and populates the macrophage genome. Related to Fig. 2.**

**A**, Heatmap representation of the expression of *Egr* transcription factor family member genes and alternative polarization marker genes over the indicated time course determined by RNA-seq.

**B**, Quantification of western blot results presented on Fig. 2D by densitometry. Experiments were repeated four times, and significant changes between groups were calculated by, two-way analysis of variance (ANOVA).

**C**, Bar plot visualization of the overall number of binding sites for STAT6 and EGR2 from ChIP-seq experiments at the indicated time points.

**D**, Histograms of average STAT6 and EGR2 binding signals at two different time points following IL-4 polarization.
