# Supplementary material for: The transcription factor EGR2 is the molecular linchpin connecting STAT6 activation to the late, stable epigenomic program of alternative macrophage polarization
Source: PubMed Central journal article supplement — Genes Dev. 2020 Nov 1;34(21-22):1474–92. doi: 10.1101/gad.343038.120 (PMC7608752; doi:10.1101/gad.343038.120), 2020-11-01
Supplement: supp_gad.343038.120_Supplemental_Fig_S3_DanielB.pdf [file supp_gad.343038.120_Supplemental_Fig_S3_DanielB.pdf]

# Supplemental Fig. S3

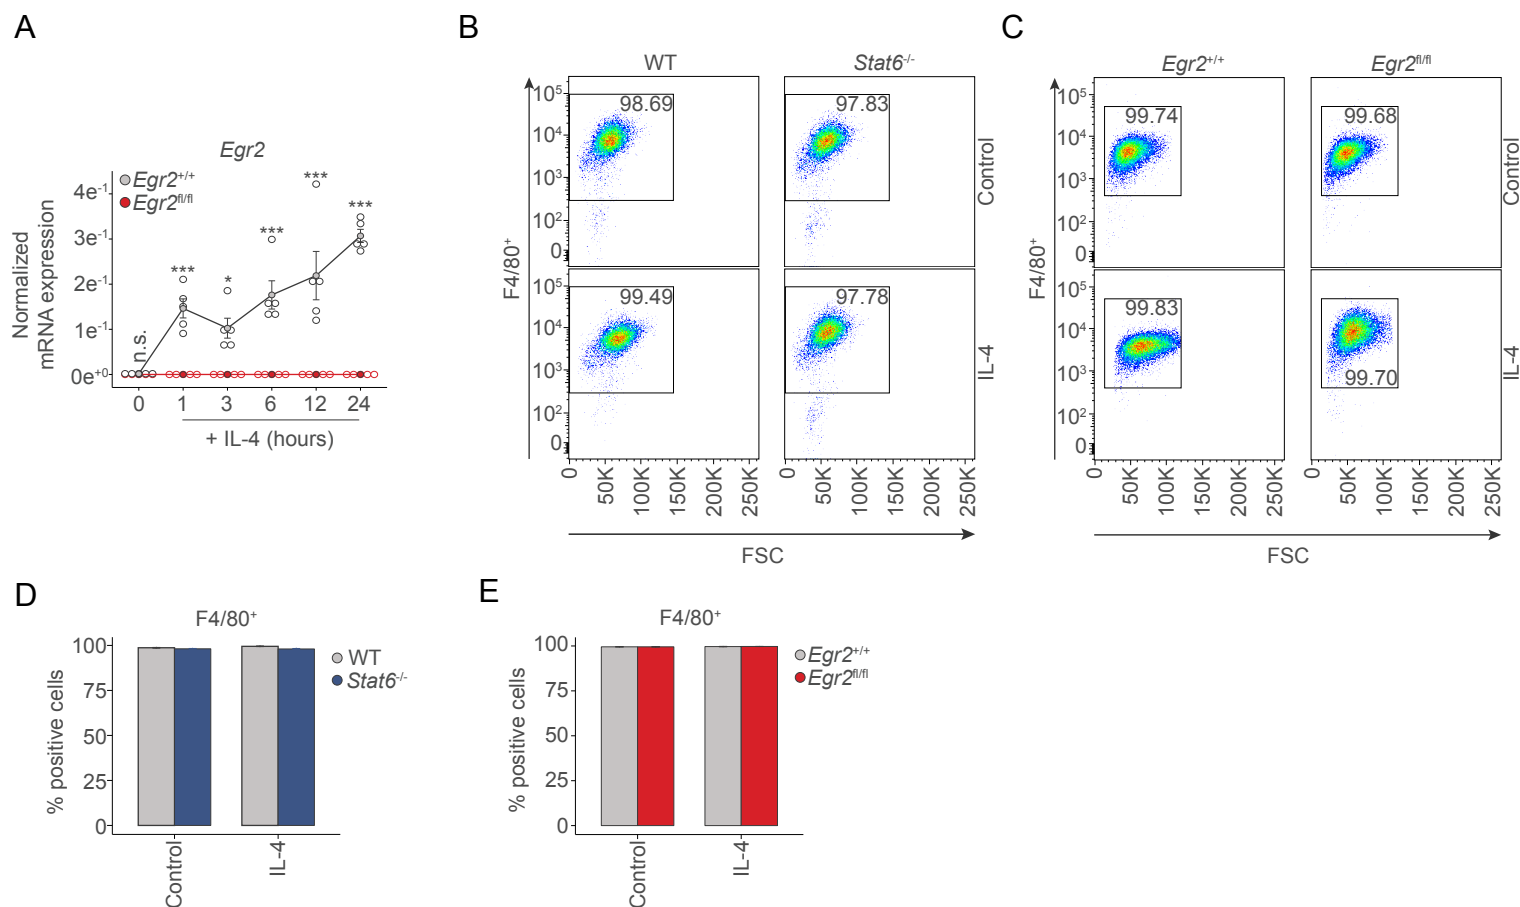

**Supplemental Fig. S3. Macrophage identity is not affected by the loss of either STAT6 or EGR2. Related to Fig. 3.**

**A**, RT-qPCR measurements of *Egr2* mRNA levels on the indicated time course from *Egr2*<sup>+/+</sup> and *Egr2*<sup>fl/fl</sup> macrophages. The level of mRNA is normalized to the expression of *Ppia*. Experiments were repeated five times, and significant changes between groups were calculated by two-way analysis of variance (ANOVA).

**B**, Representative FACS plot of ADGRE1 (F4/80) expression and forward scatter values (FSC) in control and IL-4 polarized macrophages from wild type (WT) and *Stat6*<sup>-/-</sup> macrophages.

**C**, Representative FACS plot of ADGRE1 (F4/80) expression and forward scatter values (FSC) in control and IL-4 polarized macrophages from *Egr2*<sup>+/+</sup> and *Egr2*<sup>fl/fl</sup> macrophages.

**D**, Percentages of ADGRE1 (F4/80) positive cells from WT and *Stat6*<sup>-/-</sup> macrophages under control and IL-4 polarized conditions.

**E**, Percentages of ADGRE1 (F4/80) positive cells from *Egr2*<sup>+/+</sup> and *Egr2*<sup>fl/fl</sup> macrophages under control and IL-4 polarized conditions.
