# Supplementary material for: The transcription factor EGR2 is the molecular linchpin connecting STAT6 activation to the late, stable epigenomic program of alternative macrophage polarization
Source: PubMed Central journal article supplement — Genes Dev. 2020 Nov 1;34(21-22):1474–92. doi: 10.1101/gad.343038.120 (PMC7608752; doi:10.1101/gad.343038.120), 2020-11-01
Supplement: supp_gad.343038.120_Supplemental_Fig_S4_DanielB.pdf [file supp_gad.343038.120_Supplemental_Fig_S4_DanielB.pdf]

Supplemental Fig. S4

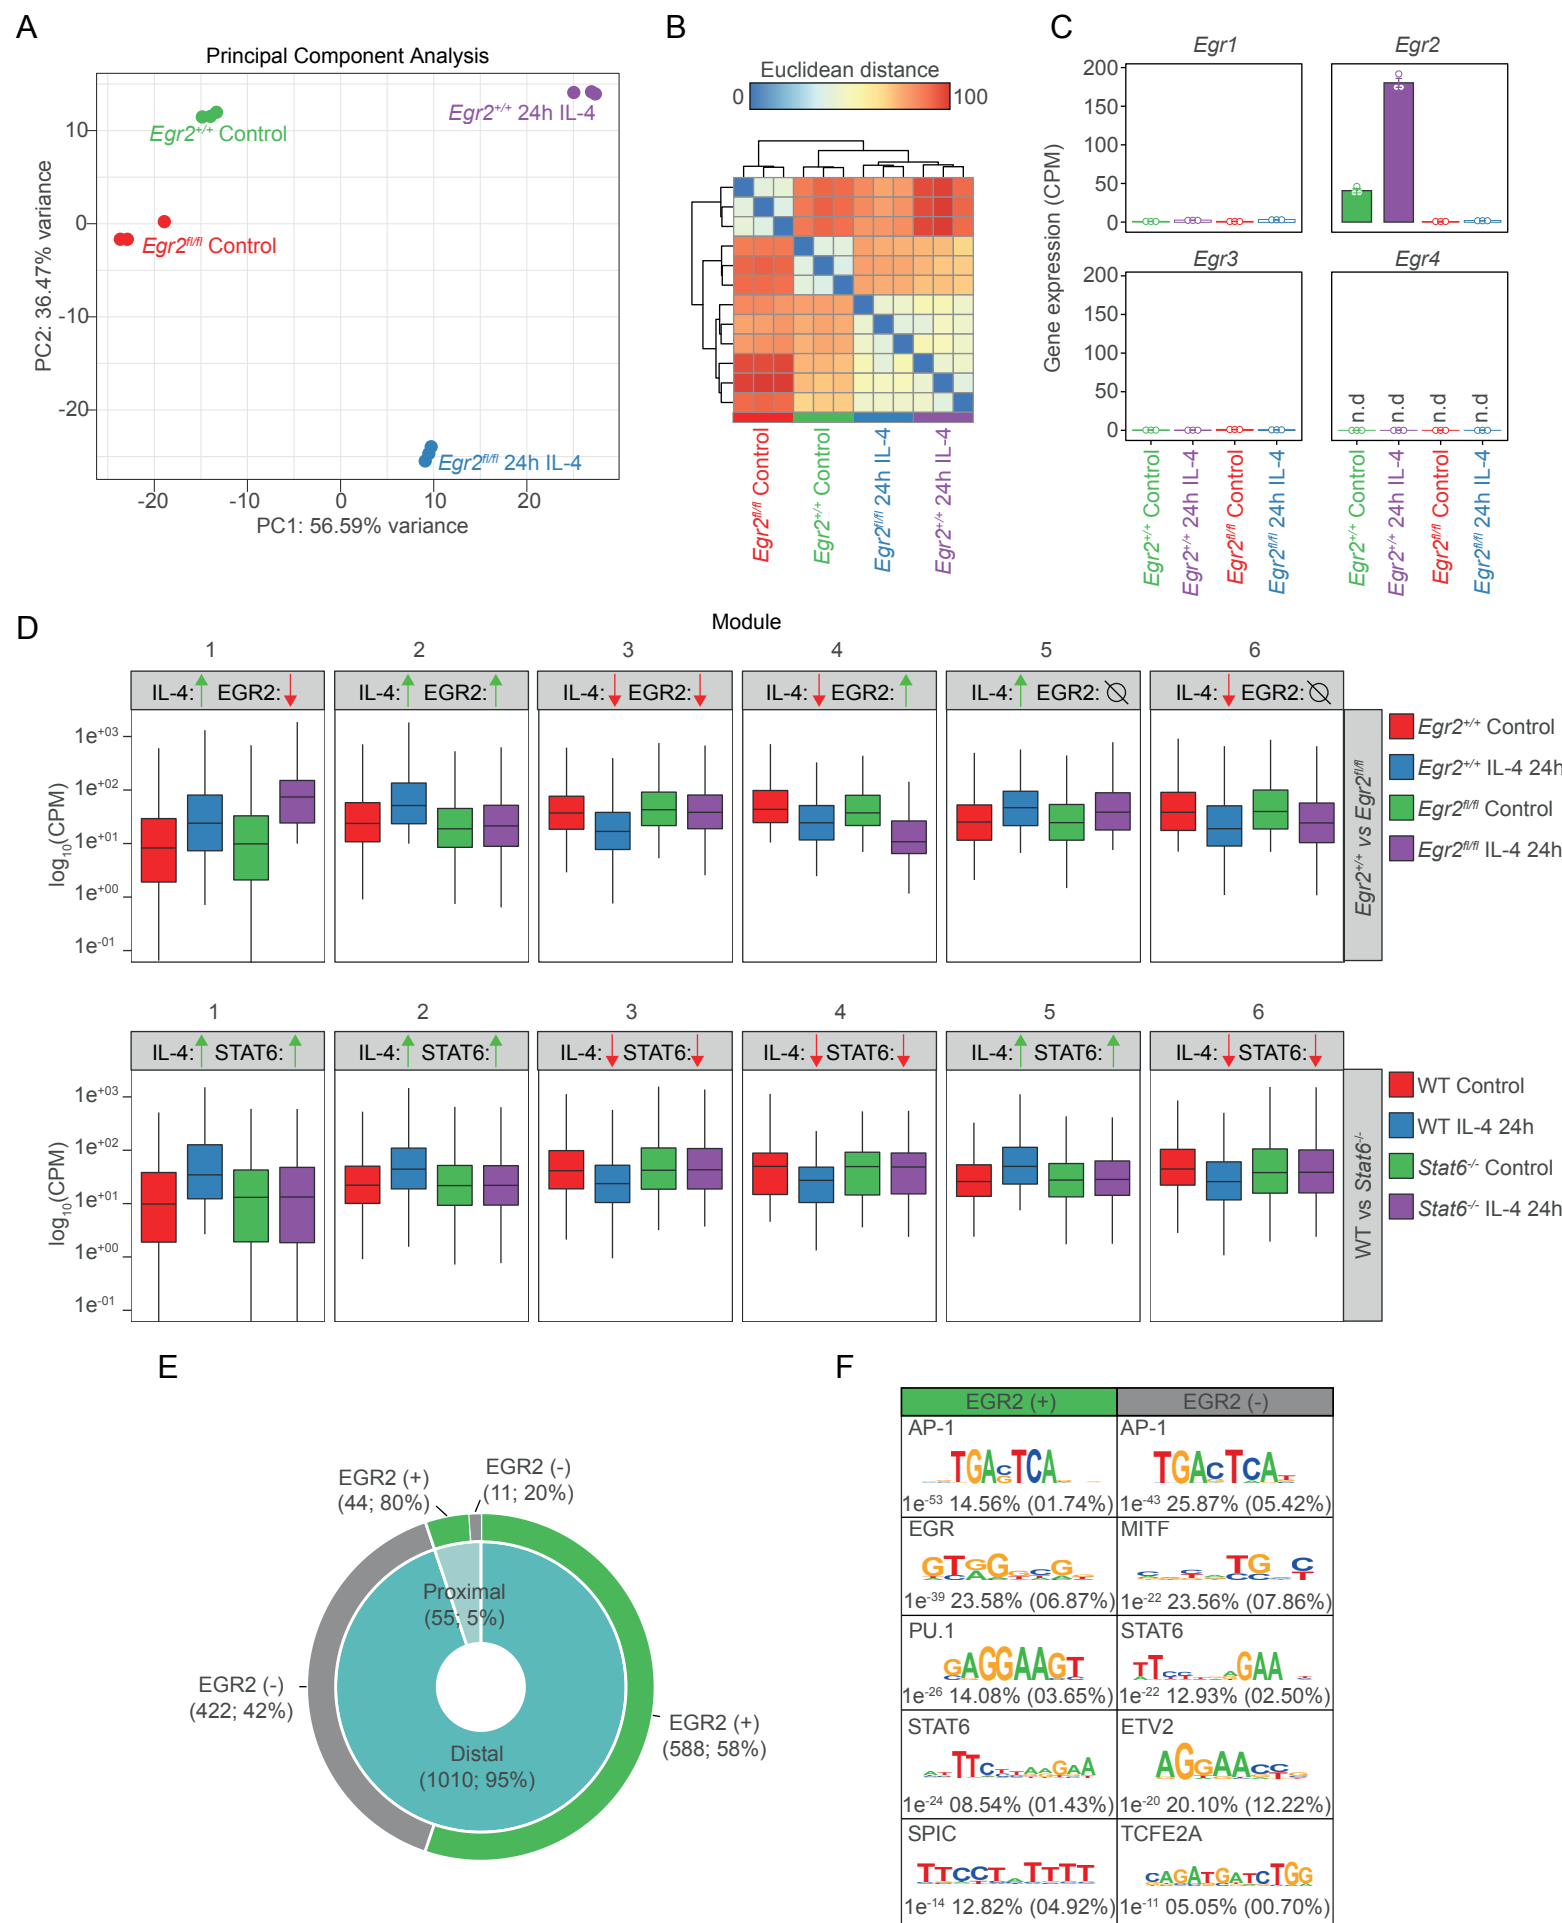

**Supplementary Fig. S4. IL-4 and EGR2 controls the alternatively polarized macrophage phenotype. Related to Fig. 4.**

**A**, Principal component analysis of RNA-seq experiments. Macrophage genotypes and treatment conditions are indicated.

**B**, Correlation heatmap visualizing Euclidean distance between the different conditions and genotypes based on the principal component analysis.

**C**, Boxplot representation of the *Egr2* gene family expression in BMDMs. Count per million values are plotted.

**D**, Boxplot representation of the expression of gene modules, exhibiting IL-4, STAT6 and EGR2 dependent expression. RNA-seq experiments were performed in *Egr2*<sup>+/+</sup>, *Egr2*<sup>-/-</sup>, *Stat6*<sup>-/-</sup> and wild type macrophages in the presence or absence of IL-4 (24h). Gene modules were defined based on IL-4 mediated gene expression changes and its dependence on STAT6 or EGR2. Green arrows indicate positive regulation of gene expression wither by the cytokine (IL-4) or the studied transcription factors (STAT6 or EGR2), whereas red arrows indicate negative regulation of gene expression by the same factors. Ø indicate no effect on gene expression. Log<sub>10</sub> CPM (Count per million) values a plotted.

**E**, Genomic distribution of regulatory regions bound (EGR2 positive (+)) or not bound (EGR2 negative (-)) by EGR2 around IL-4/EGR2-induced genes in a genomic window of +/- 100kb around the transcription start sites.

**F**, Motif enrichment analysis on the regulatory regions bound (EGR2 positive (+)) or not bound (EGR2 negative (-)) by EGR2 around IL-4/EGR2-induced genes in a genomic window of +/- 100kb around the transcription start sites. For each motif logo, p-value and percentage of genomic regions that contain the given motif in the target (P300-bound) and background genomic regions (in parenthesis) are shown.
