# Supplementary material for: The transcription factor EGR2 is the molecular linchpin connecting STAT6 activation to the late, stable epigenomic program of alternative macrophage polarization
Source: PubMed Central journal article supplement — Genes Dev. 2020 Nov 1;34(21-22):1474–92. doi: 10.1101/gad.343038.120 (PMC7608752; doi:10.1101/gad.343038.120), 2020-11-01
Supplement: supp_gad.343038.120_Supplemental_Fig_S6_DanielB.pdf [file supp_gad.343038.120_Supplemental_Fig_S6_DanielB.pdf]

**Supplemental Fig. S6**

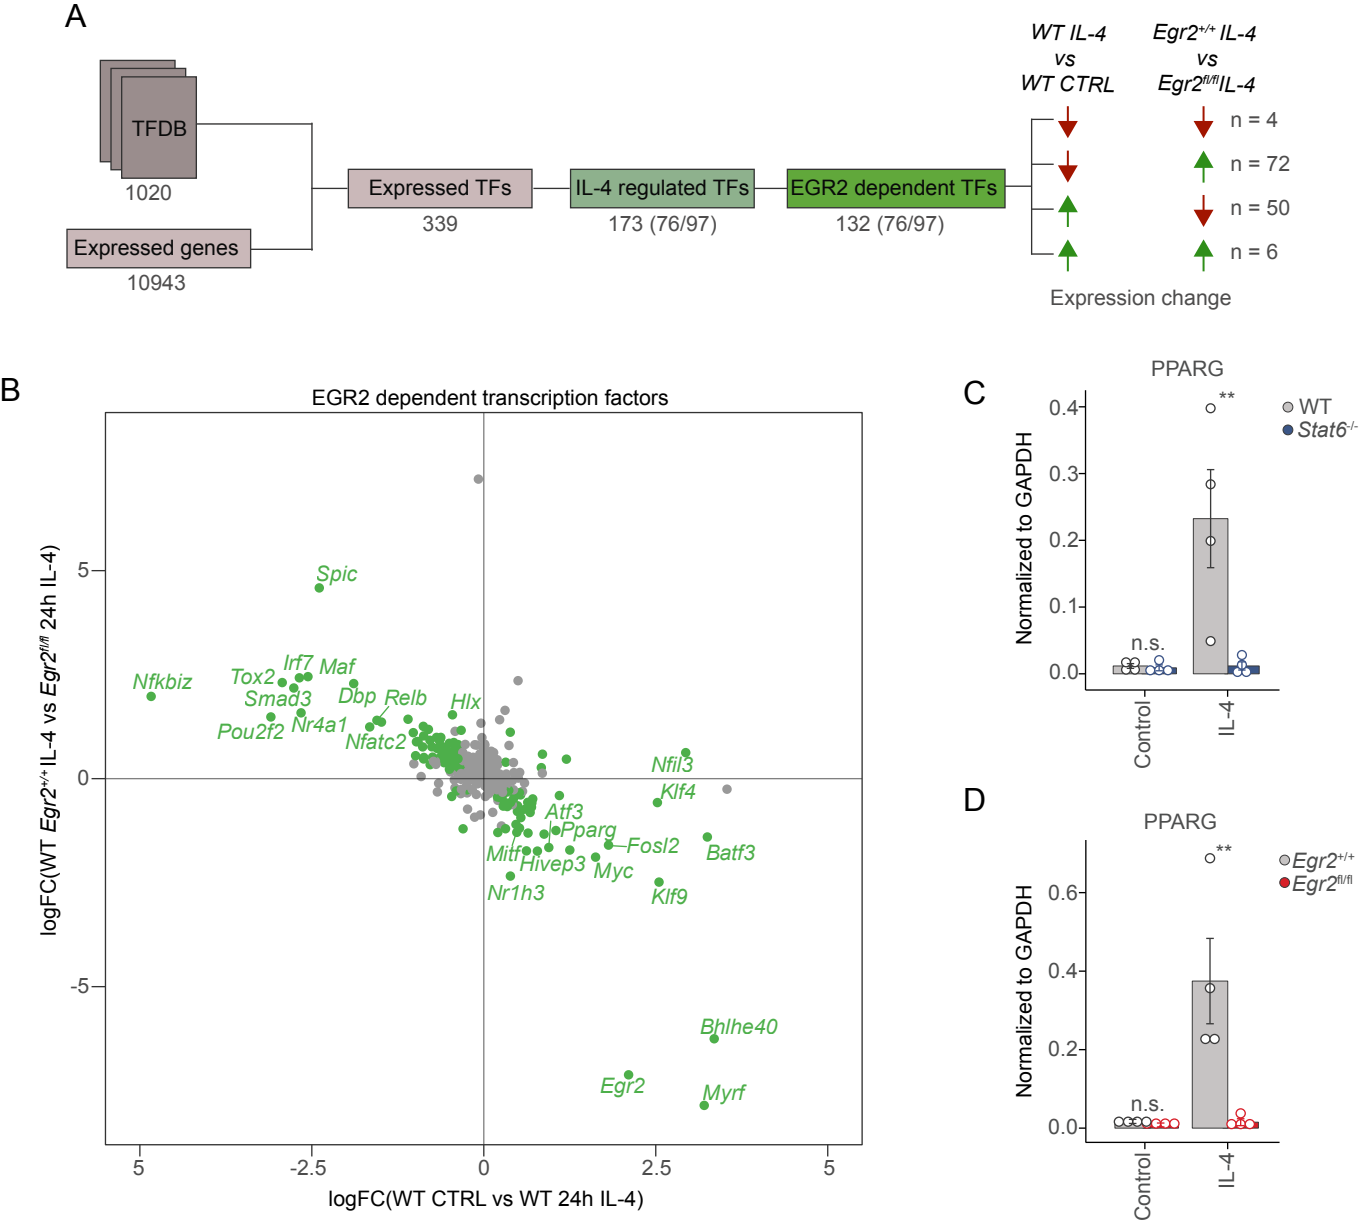

**Supplemental Fig. S6. EGR2 regulates the transcription factor cascade of alternative macrophage polarization. Related to Fig. 6.**

**A**, Analysis pipeline to investigate the transcription factor network of alternative macrophage polarization. The number of transcription factors at each step of the workflow is indicated. Red and green arrows indicate the direction of change in gene expression when wild type control and IL-4 polarized macrophages are compared. The same comparison for *Egr2*<sup>+/+</sup> and *Egr2*<sup>fl/fl</sup> macrophages is shown.

**B**, Scatter plot representation of the differentially expressed transcription factors between control and IL-4 polarized conditions in *Egr2*<sup>+/+</sup> and *Egr2*<sup>fl/fl</sup> macrophages.

**C-D**, Quantification of western blot results presented on Figure 6h (*Stat6*<sup>-/-</sup>) and i (*Egr2*<sup>fl/fl</sup>) by densitometry. Experiments were repeated four times, and significant changes between groups were calculated by, two-way analysis of variance (ANOVA).
